# Supplementary material for: Na 3 V 2 (PO 4 ) 3 -decorated Na 3 V 2 (PO 4 ) 2 F 3 as a high-rate and cycle-stable cathode material for sodium ion batteries
Source: Royal Society of Chemistry journal article supplement (doi:10.1039/d4ra01653j), 2024-01-01
Supplement: d4ra01653j1.pdf [file d4ra01653j1.pdf]

**Na<sub>3</sub>V<sub>2</sub>(PO<sub>4</sub>)<sub>3</sub>-Decorated Na<sub>3</sub>V<sub>2</sub>(PO<sub>4</sub>)<sub>2</sub>F<sub>3</sub> as a High-Rate and Cycle-Stable Cathode  
Material for Sodium Ion Batterie**

Yi Yang <sup>a,1</sup>, Guo-Rong Xu <sup>a,1</sup>, An-Ping Tang <sup>a</sup>, Jun-chao Zheng <sup>b</sup>, Lin-Bo Tang <sup>c\*</sup>, Ying-De Huang <sup>b\*</sup>,  
He-Zhang Chen<sup>a\*</sup>,

<sup>a</sup> School of Chemistry and Chemical Engineering, Hunan University of Science and Technology,  
Xiangtan, Hunan, 411201 China

<sup>b</sup>. School of Metallurgy and Environment, Central South University, Changsha 410083, Hunan,  
China

<sup>c</sup>. School of Chemistry and Chemical Engineering, Central South University, Changsha 410083,  
Hunan, China.

<sup>1</sup>. These authors contributed equally to this work.

**Corresponding Authors:** 278789069@qq.com (H. Z. Chen).

yingdecsu@foxmail.com (Y. D. Huang).

tlb943464594@csu.edu.cn (L. B. Tang)

**Table.S1** The collected cell parameters (a, b, c and V) of NVP/C, and NVPF/C, and corresponding content ratio of different phases in all composites.

| Sample      | a(Å)  | c(Å)   | V(Å <sup>3</sup> ) | Content ratio of NVP vs NVPF |
|-------------|-------|--------|--------------------|------------------------------|
| NVPF/C      | 9.034 | 10.729 | 875.59             | 0:1                          |
| NVP/C       | 8.726 | 21.797 | 1437.37            | 1:0                          |
| NVPF.3NVP/C | -     | -      | -                  | 78:22                        |

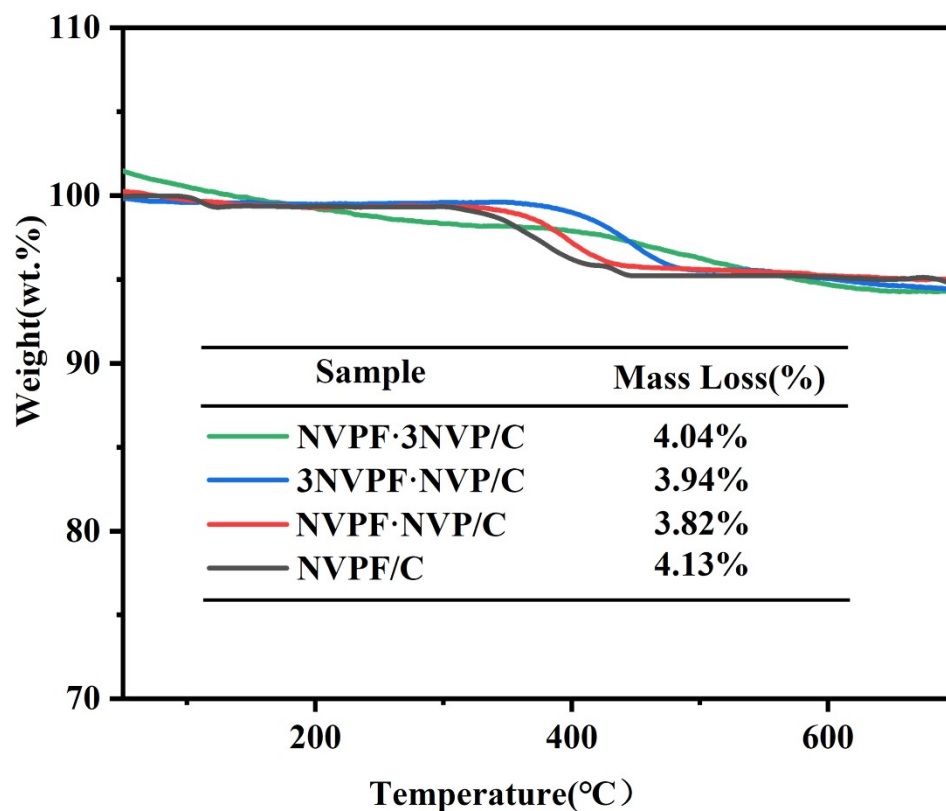

**Fig. S1** TGA curves obtained in a temperature range of 30 to 700°C at 5 °C/min under air of precursor of all samples.

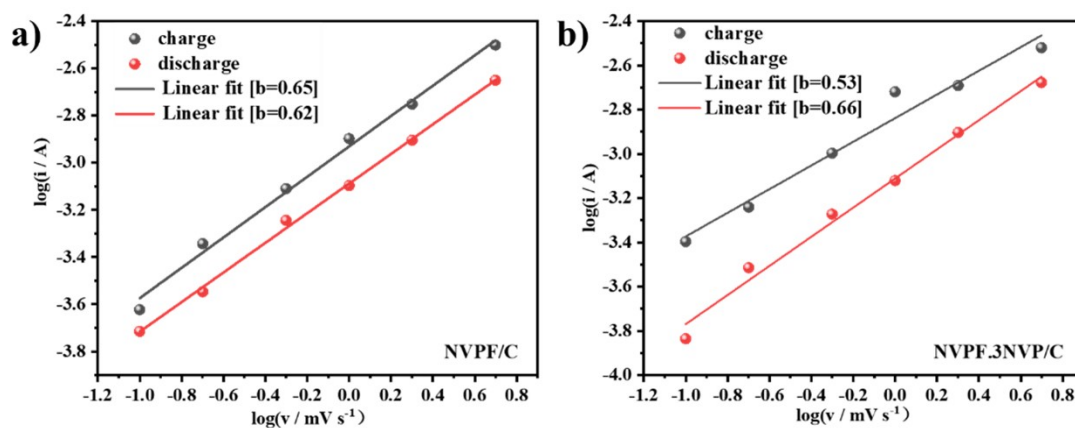

**Fig. S2** Linear relationship between  $\log i$  and  $\log v$  in CV tests for NVPF/C (a) and NVPF.3NVP/C(b)

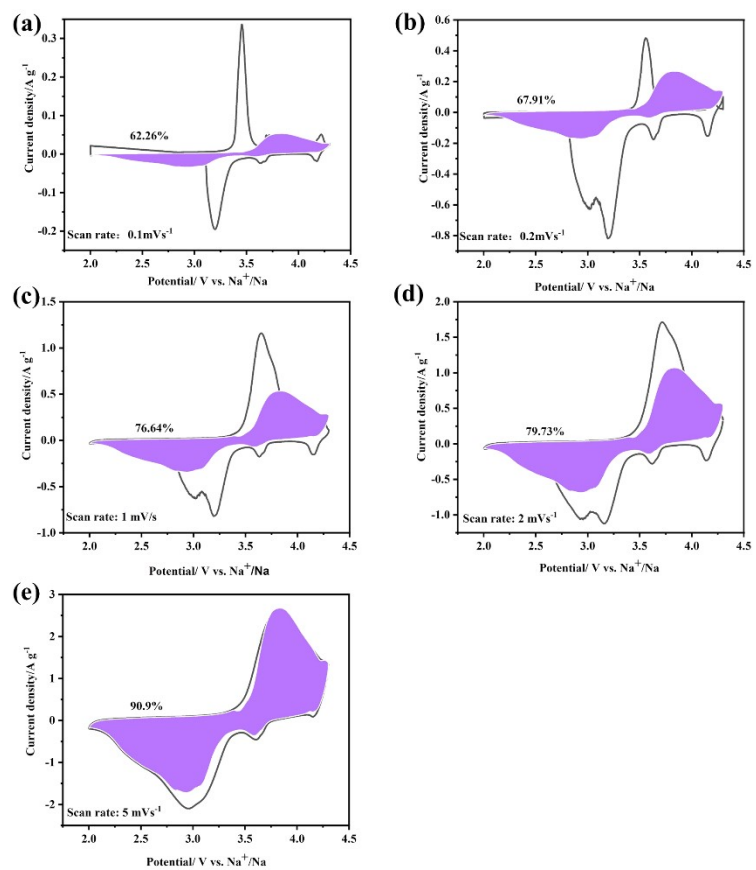

**Fig. S3** Curves of NVPF·3NVP/C for quantitative calculation as to capacitive contribution at various scan rates of 0.1 mV s<sup>-1</sup> (a), 0.2 mV s<sup>-1</sup> (b), 1 mV s<sup>-1</sup> (c), 2 mV s<sup>-1</sup> (d) and 5 mV s<sup>-1</sup> (e).

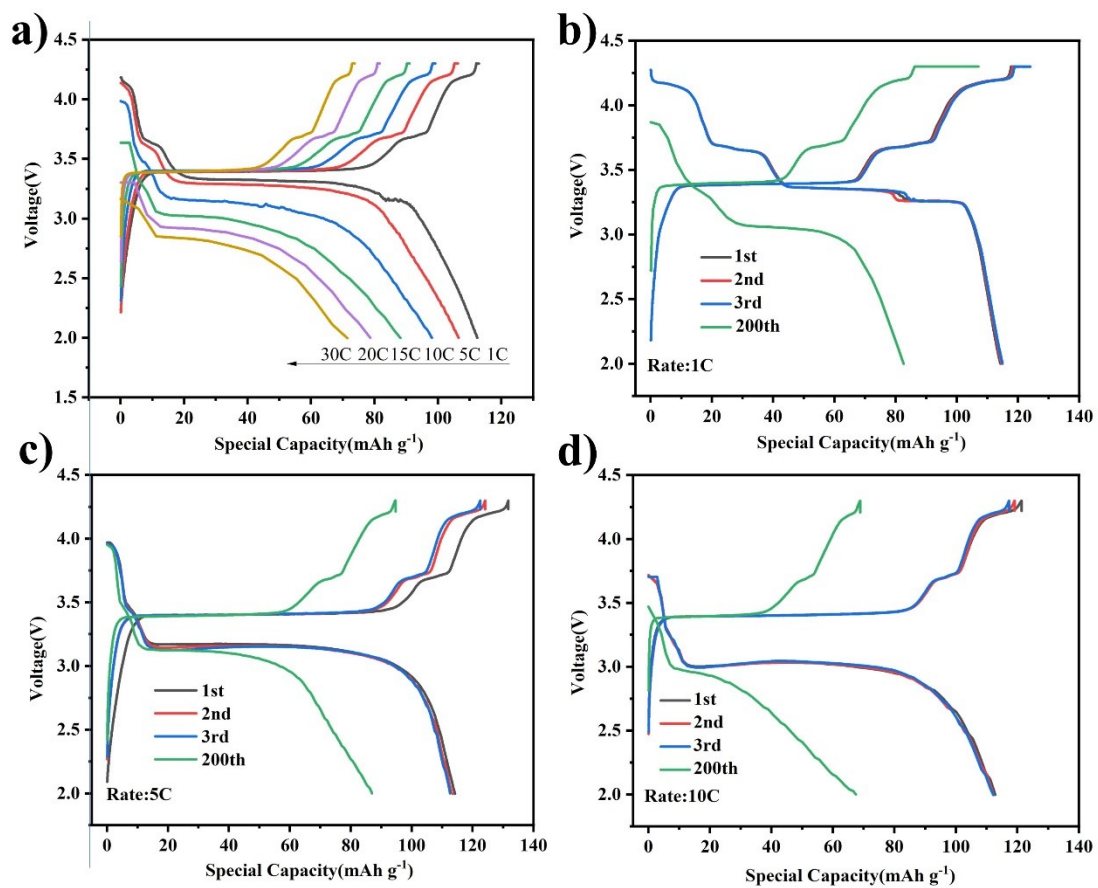

**Fig. S4** a) Charge-discharge curves of NVPF-3NVP/C at different rates. The galvanostatic charge discharge curves of NVPF-3NVP/C at 1 C b), 5 C c), and 10 C d) for the initial 3 cycles and at 200th cycle.
